# Supplementary material for: miR-138-5p suppresses autophagy in pancreatic cancer by targeting SIRT1
Source: PubMed Central journal article supplement (PMC5355247; doi:10.18632/oncotarget.14360), 2016-12-29
Supplement: oncotarget-08-11071-s001.pdf [file oncotarget-08-11071-s001.pdf]

# miR-138-5p suppresses autophagy in pancreatic cancer by targeting *SIRT1*

## Supplementary Materials

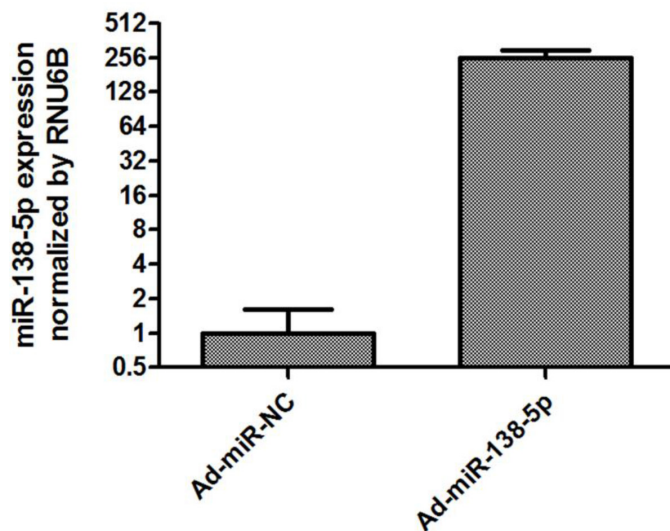

Supplementary Figure S1: Indicated cells were subjected to PCR to detect miR-138-5p expression.

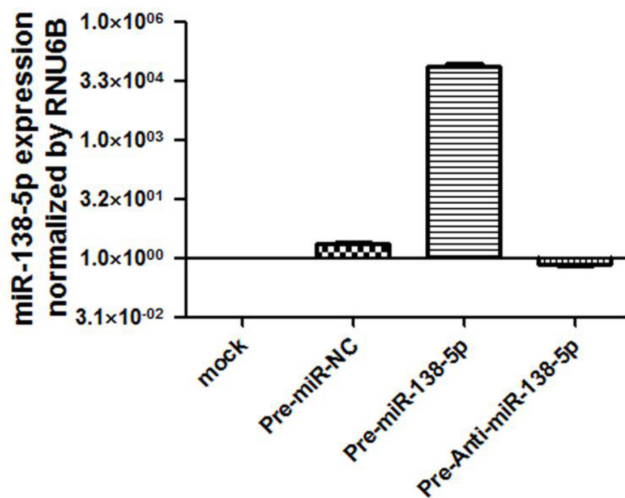

Supplementary Figure S2: Indicated cells were subjected to PCR to detect miR-138-5p expression.

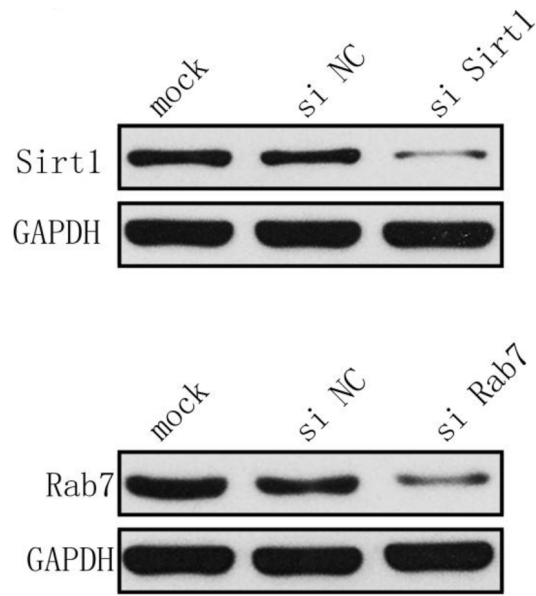

**Supplementary Figure S3:** Indicated cells were subjected to western blot to detect SIRT1 and Rab7 expression.

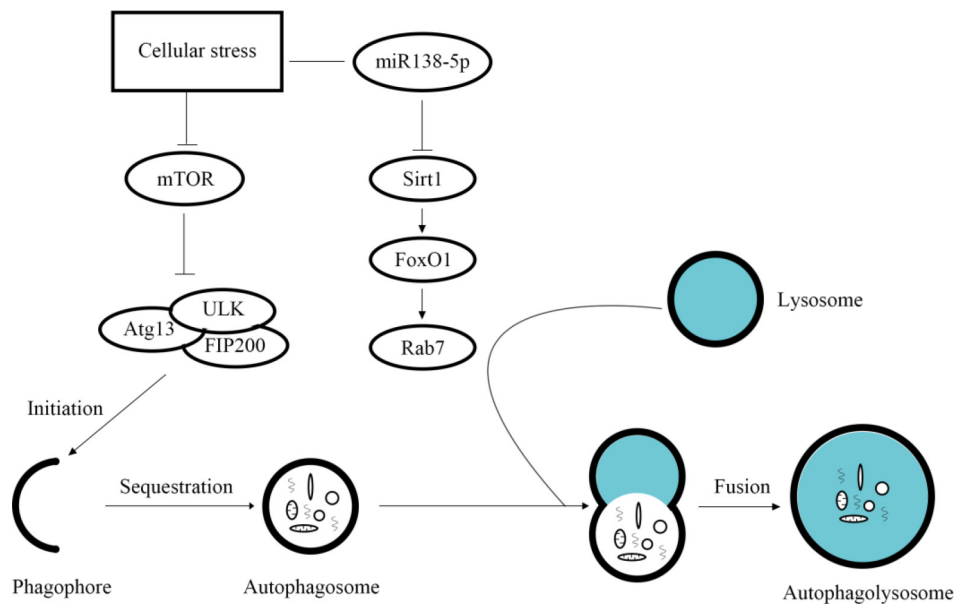

**Supplementary Figure S4:** Schematic illustration for the role of miR-138-5p on autophagy in pancreatic cancer. miR-138-5p inactivates SIRT1 through binding its 3'-UTR site. Inactivation of SIRT1 promote apoptosis probably through SIRT1-FoxO1-Rab7 axis.

**Supplementary Table S1: Association between SIRT1 expression and clinicopathological features of pancreatic cancer**

|                                         | Patients | SIRT1 expression |      | P value |
|-----------------------------------------|----------|------------------|------|---------|
|                                         |          | Low              | High |         |
| <b>Gender</b>                           |          |                  |      |         |
| Male                                    | 21       | 12               | 9    | 0.122   |
| Female                                  | 8        | 5                | 3    |         |
| <b>Age(Year)</b>                        |          |                  |      | 0.244   |
| < 65                                    | 15       | 7                | 8    |         |
| ≥ 65                                    | 14       | 11               | 3    |         |
| <b>Tumor size(cm)</b>                   |          |                  |      | 0.550   |
| ≤ 3                                     | 14       | 9                | 5    |         |
| > 3                                     | 15       | 6                | 9    |         |
| <b>Tumor stage</b>                      |          |                  |      | 0.228   |
| CIS, Ta, T1                             | 6        | 1                | 5    |         |
| T2–T4                                   | 23       | 10               | 13   |         |
| <b>Tumor grade</b>                      |          |                  |      | 0.023*  |
| Grade I, II                             | 22       | 15               | 7    |         |
| Grade III                               | 7        | 1                | 6    |         |
| <b>Lymphnodes status</b>                |          |                  |      | 0.278   |
| Negative                                | 21       | 13               | 8    |         |
| Positive                                | 8        | 6                | 2    |         |
| <b>Surrounding tissues infiltration</b> |          |                  |      | 0.023*  |
| Negative                                | 12       | 5                | 7    |         |
| Positive                                | 17       | 14               | 3    |         |

\* $p < 0.05$ .

**Supplementary Table S2: The detailed information of the patients enrolled in tissue array.** See Supplementary\_Table\_S2
